# Supplementary material for: Suitability of analytical methods to determine tebuconazole, propiconazole and permethrin in aged wood samples
Source: Springer Nature journal article supplement (doi:10.1007/s00107-020-01496-y), 2020-01-30
Supplement: MOESM1 [file 107_2020_1496_MOESM1_ESM.docx]

**Suitability of analytical methods to determine tebuconazole, propiconazole and permethrin in aged wood samples**

Ute Schoknecht, Petra Drescher, Martin Fischer, Christina Fürhapper,Jan Gunschera,Rainer Hill,Eckhard Melcher,Robby Wegner,Ursula Wilken,Joachim Wittenzellner

**Supplementary material**

S1: GC-MS (EI) mass spectra of tebuconazole, propiconazole and permethrin

S2: Extraction conditions applied in different laboratories

S3: HPLC conditions in different laboratories

S4: GC conditions in different laboratories

S5: Results for sample A from different analytical procedures

S6: Results for sample B from different analytical procedures

S7: Results for sample C from different analytical procedures (series C)

S8: Results for propiconazole and tebuconazole in sample C from HPLC analysis (series 2)

S9: Results for permethrin in sample C from HPLC analysis (series 2)

For Tables S2 to S9 see Excel-file ‘supplementary material tables S2 to S9’

**S1: GC-MS (EI) mass spectra of tebuconazole, propiconazole and permethrin**

Figure S1-1: Mass spectrum of tebuconazole

Figure S1-2: Mass spectrum of propiconazole

Figure S1-3: Mass spectrum of permethrin
