# Supplementary material for: Suitability of analytical methods to determine tebuconazole, propiconazole and permethrin in aged wood samples
Source: Springer Nature journal article supplement (doi:10.1007/s00107-020-01496-y), 2020-01-30
Supplement: MOESM2 [file 107_2020_1496_MOESM2_ESM.xlsx]

## Sheet: Table S2
S2: Extraction conditions applied in different laboratories
All samples were sonicated for 2 h at a temperature not exceeding 50 °C.
Laboratory	Sample preparation
	solvent	solvent volume	filtration
		ml g-1 wood
A	methanol	20	0.2 µm PTFE
B	methanol	20	0.2 µm PTFE
C	methanol	20
D	methanol	20
E	methanol	10	0.2 µm PTFE
F	methanol	10	PTFE
G	toluene (series 1) and methanol (series 2)	20	0.45 µm PTFE
H	methanol	20
I	methanol	20	0.45 µm PTFE
K	methanol	20	0.2 µm PTFE

## Sheet: Table S3
S3: HPLC conditions in different laboratories
Laboratory	Analytes	LC equipment	Column	Supplier	Gradient components	Injection	Wavelength	Flow	Temperature	Calibration
					(percent values represent percent by volume)	volume	(DAD)			standards in
						µl	nm	ml min-1	°C
A	tebuconazole propiconazole	LC-MS	Luna C18 100 Å, 150*4.6 mm, 3 µm	Phenomenex	CH3CN and 0.2 % CH3COOH	1		0.5	35	methanol
	propiconazole permethrin	UHPLC	Poroshell 120 C18, 100*4,6	Agilent	CH3CN and H2O or CH3CN and 0.1 % NH4OH + 5 % CH3CN in H2O	2	225	0.8	40	methanol
B	tebuconazole propiconazole permethrin	UPLC	Aquity BEH C18, 100*2.1 mm, 1.7 µm	Waters	CH3CN and 0.1 % NH4OH + 5 % CH3CN in H2O	5	223	0.6	40	methanol
	permethrin		Aquity BEH C18, 100*2.1 mm, 1.7 µm	Waters	CH3CN and 0.1 % NH4OH + 5 % CH3CN in H2O	5	223	0.4	25	methanol
C	tebuconazole propiconazole permethrin		Accucore C18, 150*3 mm, 2.6 µm	Thermo Fisher Scientific	CH3CN and 0.1 % H3PO4 and MeOH	8	225	0.7	40	methanol or matrix*
D	propiconazole tebuconazole permethrin		Raptor C18 150*4.6, 2,7 µm	Restek	CH3CN and H2O	10	195 and 205	0.9	30	methanol
E	tebuconazole propiconazole		Kinetex C18 100 Å, 150*4.6 mm, 2.6 µm	Phenomenex	CH3CN and 0.1 % H3PO4 and MeOH	10	225	1.5	40	methanol
	permethrin		Kinetex C18 100 Å, 150*4.6 mm, 2.6 µm	Phenomenex	CH3CN and 0.1 % H3PO4 and MeOH	10	225	1.0	25	methanol
G	propiconazole tebuconazole permethrin		Nucleodur C18 Gravity-SB, 125*4, 3 µm	Macherey-Nagel	CH3CN and H2O	10	210	1,0	25	methanol
H	tebuconazole propiconazole		Hypersil ODS 125*4 mm, 5 µm	Thermo Fisher Scientific	CH3CN and 0.5 % (NH4)2CO3	30	210	1.5	RT	methanol or matrix*
	permethrin				CH3CN and H2O	30	215	1.0	RT	methanol
I	tebuconazole propiconazole		Luna C18 100 Å, 150*4.6 mm, 3 µm	Phenomenex	CH3CN and 0.5 % (NH4)2CO3	15	225	1.0	25	methanol
	permethrin		Aquasil C18, 250* 4.6 mm, 5 µm	Thermo Fisher Scientific	CH3CN and 0.001 M H3PO4	10	210	1.0	25	methanol
K	tebuconazole propiconazole permethrin		Kinetex C18 100 Å, 150*4.6 mm, 2.6 µm		CH3CN and 0.1 % H3PO4 and MeOH	10	225	1.3	40	methanol
* wood extract in methanol
RT: room temterature

## Sheet: Table S4
S3: GC conditions in different laboratories
Samples were diluted in the solvent used for extraction if necessary.
Laboratory	Analytes	Column	Supplier	Injection	Injection volume	Temperature	Detector	Temperature programme	Calibration
				mode	µl	°C	Type		standards in
A	tebuconazole propiconazole permethrin	HP-5MS, 30 m*0.25 mm*0.25 µm	Agilent	pulsed splitless	1	280	MSD	50 °C (2 min), 20 °/min to 220 °C, 3 °/min to 260 °C, 20 °/min to 280 °C (3 min)	matrix
		DB-1701, 15 m*0.32 mm*0,25 µm	Agilent	splitless	1	250	ECD, FID	100 °C (0.5 min), 20 °/min to 220 °C, 10 °/min to 280 °C (3 min)	matrix
B	propiconazole permethrin	ZB-1701m, 30 m*0,32 mm*0,25	Phenomenex	split	1	280	ECD	190 °C, 18 °/min to 250 °C (15 min)	methanol
F	tebuconazole propiconazole permethrin	TG-5SilMS, 30 m*0,25 mm*0,25 µm	Thermo Fisher Scientific	splitless	1	250	MSD	100 °C (2 min), 20 °/min to 280 °C (8 min)	matrix
G	propiconazole permethrin	Optima Delta 3, 30 m*0,25 mm*0,25 µm	Macherey-Nagel	split	1	265	ECD	220 °C (2 min), 3 °/min to 250 °C (1 min), 25 °/min to 300 °C (4 min)	methanol
	tebuconazole			split	1	250	FID	200 °C (1 min), 10 °/min to 250 °C (5 min)	methanol
* wood extract in methanol

## Sheet: Table S5
S5: Results for sample A from different analytical procedures
Concentrations are related to air-dry wood samples.
												Calculations
Active substance		Propiconazole				Tebuconazole
Original content (calculated)		160 mg kg-1				160 mg kg-1						Laboratory	Analytical method	Results for subsamples			Mean	SD
Analytical method		GC-ECD	GC-MS	HPLC-UV	LC-MS	GC-ECD	GC-FID	GC-MS	HPLC-UV	LC-MS				1	2	3
Laboratory	n (subsamples)	mg kg-1	mg kg-1	mg kg-1	mg kg-1	mg kg-1	mg kg-1	mg kg-1	mg kg-1	mg kg-1		Propiconazole		mg kg-1	mg kg-1	mg kg-1	mg kg-1	mg kg-1	%
A	3	120	141		141		115	130		120		A	GC-ECD	121	120	120	120.333	0.57735	0.479792
B		125		121					132				GC-MS	145	138	140	141	3.60555	2.55713
C-1				131.92					119.78				LC-MS	141	141	142	141.333	0.57735	0.408503
C-2				98.43					102.35			F	GC-MS	146	139		142.5
D		127				132						H-1	HPLC-UV	92	91		91.5
E				150					142			H-2	HPLC-UV	123	129		126
F	2		143					154				I	HPLC-UV	174	177		175.5
G		96
H-1	2			92					64			Tebuconazole		mg kg-1	mg kg-1	mg kg-1	mg kg-1	mg kg-1	%
H-2	2			126					114			A	GC-FID	118	114	114	115.333	2.3094	2.00237
I	2			176					149				GC-MS	133	127	129	129.667	3.05505	2.35608
K				107					87				LC-MS	120	120	120	120	0	0
n (methods)		4	2	8	1	1	1	2	8	1		F	GC-MS	156	151		153.5
Mean [mg/kg]		117	142	125.294	141	132	115	142	113.766	120		H-1	HPLC-UV	61	67		64
SD [mg/kg]		14.3062		27.7982					28.6124			H-2	HPLC-UV	112	115		113.5
SD [%]		12.2275		22.1864					25.1502			I	HPLC-UV	148	150		149
Recovery [%]		73.125	88.75	78.3086	88.125	82.5	71.875	88.75	71.1039	75
C-1 and H-1: calibration based on standards in methanolic wood extract (matrix)
C-2 and H-2: calibration based on standards in methanol

## Sheet: Table S6
S6: Results for sample B from different analytical procedures
Concentrations are related to air-dry wood samples.
Active substance		Propiconazole				Tebuconazole						Calculations
Original content (calculated)		160 mg kg-1				160 mg kg-1
Analytical method		GC-ECD	GC-MS	HPLC-UV	LC-MS	GC-ECD	GC-FID	GC-MS	HPLC-UV	LC-MS		Laboratory	Analytical method	Results for subsamples			Mean	SD
Laboratory	n (subsamples)	mg kg-1	mg kg-1	mg kg-1	mg kg-1	mg kg-1	mg kg-1	mg kg-1	mg kg-1	mg kg-1				1	2	3
A	3	104	108		140		85	112		117		Propiconazol		mg kg-1	mg kg-1	mg kg-1	mg kg-1	mg kg-1	%
B		98		114					115			A	GC-ECD	104	108	99	103.667	4.50925	4.34976
C-1				164.54					142.58				GC-MS	134	133	122	129.667	6.65833	5.13496
C-2				101.78					100.81				LC-MS	139	142	138	139.667	2.08167	1.49045
D		123				108						F	GC-MS	126	127		126.5
E				152					124			H-1	HPLC-UV	109	103		106
F	2		127					127				H-2	HPLC-UV	115	115		115
G		74										I	HPLC-UV	177	177		177
H-1	2			106					78
H-2	2			115					118			Tebuconazol		mg kg-1	mg kg-1	mg kg-1	mg kg-1	mg kg-1	%
I	2			177					127			A	GC-FID	86	86	82	84.6667	2.3094	2.72764
K				93					60				GC-MS	116	115	104	111.667	6.65833	5.96268
n (methods)		4	2	8	1	1	1	2	8	1			LC-MS	116	118	117	117	1	0.854701
Mean [mg/kg]		99.75	117.5	127.915	140	108	85	119.5	108.174	117		F	GC-MS	128	126		127
SD [mg/kg]		20.2052		31.7886					27.3005			H-1	HPLC-UV	77	78		77.5
SD [%]		20.2558		24.8513					25.2377			H-2	HPLC-UV	118	117		117.5
Recovery [%]		62.3438	73.4375	79.9469	87.5	67.5	53.125	74.6875	67.6086	73.125		I	HPLC-UV	124	130		127
C-1 and H-1: calibration based on standards in methanolic wood extract (matrix)
C-2 and H-2: calibration based on standards in methanol
Recovery [%]	Sample A	73.125	88.75	78.3086	88.125	82.5	71.875	88.75	71.1039	75
Recovery [%]	Sample B	62.3438	73.4375	79.9469	87.5	67.5	53.125	74.6875	67.6086	73.125
Recovery [%]	Difference A - B	10.7812	15.3125	-1.63828	0.625	15	18.75	14.0625	3.49531	1.875

## Sheet: Table S7
S7: Results for sample C from different analytical procedures (series 1)
Concentrations are related to air-dry wood samples.
Active substance		Propiconazole				Tebuconazole					Permethrin				Calculations
Original content (calculated)		80 mg kg-1				80 mg kg-1					140 mg kg-1
Analytical method		GC-ECD	GC-MS	HPLC-UV	LC-MS	GC-ECD	GC-FID	GC-MS	HPLC-UV	LC-MS	GC-ECD	GC-MS	HPLC-UV		Laboratory	Analytical method	Results for subsamples			Mean	SD
Laboratory	n (subsamples)	mg kg-1	mg kg-1	mg kg-1	mg kg-1	mg kg-1	mg kg-1	mg kg-1	mg kg-1	mg kg-1	mg kg-1	mg kg-1	mg kg-1				1	2	3
A	3	63	76		86		64	67		69	153	168	154		Propiconazol		mg kg-1	mg kg-1	mg kg-1	mg kg-1	mg kg-1	%
B		71		65					68		155		141		A	GC-ECD	63	64	63	63.3333	0.57735	0.911606
C-1				64.82					59.67				132.68			GC-MS	76	77	76	76.3333	0.57735	0.756354
C-2				60.94					57.1							LC-MS	85	87	86	86	1	1.16279
D		73				58					178				F	GC-MS	78	80	79	79	1	1.26582
E				81					57				149		H-1	HPLC-UV	41	44		42.5
F	3		79					81				165			H-2	HPLC-UV	67	67		67
G											97				I	HPLC-UV	118	116		117
H-1	2			43					43				138
H-2	2			67					102				144		Tebuconazol		mg kg-1	mg kg-1	mg kg-1	mg kg-1	mg kg-1	%
I	2			117					111						A	GC-FID	64	63	66	64.3333	1.52753	2.37439
K				102					38				168			GC-MS	67	68	67	67.3333	0.57735	0.857451
n (methods)		3	2	8	1	1	1	2	8	1	4	2	7			LC-MS	68	70	69	69	1	1.44928
Mean [mg/kg]		69	77.5	75.095	86	58	64	74	66.9712	69	145.75	166.5	146.669		F	GC-MS	80	82	80	80.6667	1.1547	1.43145
SD [mg/kg]		5.2915		23.959					26.2698		34.4226		11.721		H-1	HPLC-UV	43	42		42.5
SD [%]		7.66884		31.905					39.2256		23.6176		7.9915		H-2	HPLC-UV	105	98		101.5
Recovery [%]		86.25	96.875	93.8688	107.5	72.5	80	92.5	83.7141	86.25	104.107	118.929	104.763		I	HPLC-UV	111	111		111
C-1 and H-1: calibration based on standards in methanolic wood extract (matrix)
C-2 and H-2: calibration based on standards in methanol															Permethrin		mg kg-1	mg kg-1	mg kg-1	mg kg-1	mg kg-1	%
															A	GC-ECD	157	152	150	153	3.60555	2.35657
																GC-MS	170	170	164	168	3.4641	2.06197
																HPLC-UV	155	157	151	154.333	3.05505	1.97951
															F	GC-MS	163	165	167	165	2	1.21212
															H-1	HPLC-UV	139	136		137.5
															H-2	HPLC-UV	143	144		143.5

## Sheet: Table S8
S8: Results for propiconazole and tebuconazole in sample C from HPLC analysis (series 2)
Concentrations are related to air-dry wood samples.
Active substance				Propiconazole			Tebuconazole				Calculations
Original content (calculated)				80 mg kg-1			80 mg kg-1
Laboratory	Column	Gradient	n (subsamples)	Solvent for calibration standards			Solvent for calibration standards				Laboratory	Analytical method	Results for subsamples			Mean	SD			Laboratory	Calibration	Results for subsamples			Mean
				methanol	methanol extract of matrix A	methanol extract of matrix B	methanol	methanol extract of matrix A	methanol extract of matrix B				1	2	3						standards in	1	2	3
				mg kg-1	mg kg-1	mg kg-1	mg kg-1	mg kg-1	mg kg-1		Propiconazol		mg kg-1	mg kg-1	mg kg-1	mg kg-1	mg kg-1	%		Tebuconazol		mg kg-1	mg kg-1	mg kg-1	mg kg-1
A	Poroshell 120 C18	CH3CN and H2O	3	70.1333	73.0667	78.0667					A	MeOH	63.2	80.6	66.6	70.1333	9.22244	13.1499		A	MeOH
	Poroshell 120 C18	CH3CN and 0,1 % NH4OH + 5 % CH3CN in H2O	3	67.8	74.3333	80.5333						matrix A	74	83	62.2	73.0667	10.4314	14.2765			matrix A
B	Aquity BEH C18	CH3CN and 0,1 % NH4OH + 5 % CH3CN in H2O	2	70.4	65	66	67	59	65			matrix B	75	84.6	74.6	78.0667	5.66157	7.25222			matrix B
C	Accurore C18	CH3CN and 0,1 % H3PO4 + MeOH		53	55	62	55	58	56		A (2)	MeOH	68.4	65.4	69.6	67.8	2.16333	3.19075		A (2)	MeOH
D	Raptor C18	CH3CN and H2O	2	71			60.5					matrix A	74.4	70	78.6	74.3333	4.30039	5.78527			matrix A
E	Kinetex C18	CH3CN and 0,1 % H3PO4 and MeOH	2	56		86.15	58.55		54.7			matrix B	82	77	82.6	80.5333	3.07463	3.81783			matrix B
	Kinetex C18	CH3CN and 0,1 % H3PO4 and MeOH*	2			72			69.3		B	MeOH	70.5	70.3		70.4				B	MeOH	65.7	68.3		67
G	Nucleodur C18	CH3CN and H2O		68			60					matrix A	65.1	64.9		65					matrix A	57.5	60.1		58.8
H	Hypersil ODS	CH3CN and 0,5 % (NH4)2CO3	2	56.2	61.25	53.95			47			matrix B	65.7	65.5		65.6					matrix B	63.7	66.4		65.05
K	Kinetex C18	CH3CN and 0,1 % H3PO4	2	72			45				C	MeOH	53			53				C	MeOH	55			55
n (methods)				9	5	7	6	2	5			matrix A	55			55					matrix A	58			58
Mean [mg/kg]				64.9481	65.73	71.2429	57.675	58.5	58.4			matrix B	62			62					matrix B	56			56
SD [mg/kg]				7.58095	8.11758	11.311	7.33374		8.82865		D	MeOH	74.3	68.2		71.25				D	MeOH	63.9	57.1		60.5
SD [%]				11.6723	12.3499	15.8767	12.7156		15.1175			matrix A									matrix A
Recovery [%]				81.1852	82.1625	89.0536	72.0938	73.125	73			matrix B									matrix B
											E	MeOH	52.7	56.4		54.55				E	MeOH	57.8	59.3		58.55
												matrix A									matrix A
C-1 and H-1: calibration based on standards in methanolic wood extract (matrix)												matrix B	84.6	87.7		86.15					matrix B	52.5	56.9		54.7
C-2 and H-2: calibration based on standards in methanol											E (2)	MeOH								E (2)	MeOH
*different gradient												matrix A									matrix A
												matrix B	67.7	73.5		70.6					matrix B	65.7	72.9		69.3
											G	MeOH	68			68				G	MeOH	60			60
												matrix A									matrix A
												matrix B									matrix B
											H	MeOH	53.6	58.8		56.2				H	MeOH
												matrix A	57	65.5		61.25					matrix A
												matrix B	50.3	57.6		53.95					matrix B	45.5	48.5		47
											K	MeOH	75	69		72				K	MeOH	41	48		44.5
												matrix A									matrix A
												matrix B									matrix B

## Sheet: Table S9
S9: Results for permethrin in sample C from HPLC analysis (series 2)
Concentrations are related to air-dry wood samples.
Active substance				Permethrin				Calculations
Original content (calculated)				140 mg kg-1
Laboratory	Column	Gradient	n (subsamples)	Solvent for calibration standards				Laboratory	Calibration standards	Results for subsamples			Mean	SD
				methanol	methanol extract of matrix A	methanol extract of matrix B			standards in	1	2	3
				mg kg-1	mg kg-1	mg kg-1		Permethrin		mg kg-1	mg kg-1	mg kg-1	mg kg-1	mg kg-1	%
A	Poroshell 120 C18	CH3CN and H2O		118	136.333	137.667		A	MeOH	119	115	120	118	2.64575	2.24216
	Poroshell 120 C18	CH3CN and 0,1 % NH4OH + 5 % CH3CN in H2O		121	134.333	136.667			matrix A	140	131	138	136.333	4.72582	3.46637
B	Aquity BEH C18	CH3CN and 0,1 % NH4OH + 5 % CH3CN in H2O		136.55	127	130			matrix B	140	134	139	137.667	3.21455	2.33502
C	Accurore C18	CH3CN and 0,1 % H3PO4 + MeOH		121	127	125		A (2)	MeOH	121	119	123	121	2	1.65289
D	Raptor C18	CH3CN and H2O		160.05					matrix A	133	132	138	134.333	3.21455	2.39297
E	Kinetex C18	CH3CN and 0,1 % H3PO4 and MeOH		129.65		126.8			matrix B	136	136	138	136.667	1.1547	0.844903
	Kinetex C18	CH3CN and 0,1 % H3PO4 and MeOH*				131.3		B	MeOH	137.3	135.8		136.55
G	Nucleodur C18	CH3CN and H2O		122		122			matrix A	127.7	126.3		127
H	Hypersil ODS	CH3CN and 0,5 % (NH4)2CO3		129.1	131.1	130			matrix B	130.8	129.4		130.1
n (methods)				8	5	8		C	MeOH	121			121
Mean [mg/kg]				129.669	131.153	129.929			matrix A	127			127
SD [mg/kg]				13.7111	4.22635	5.3999			matrix B	125			125
SD [%]				10.5739	3.22245	4.15603		D	MeOH	157.8	162.3		160.05
Recovery [%]				92.6205	93.681	92.8065			matrix A
									matrix B
								E	MeOH	125.5	133.8		129.65
									matrix A
C-1 and H-1: calibration based on standards in methanolic wood extract (matrix)									matrix B	126.6	127		126.8
C-2 and H-2: calibration based on standards in methanol								E (2)	MeOH
*different gradient									matrix A
									matrix B	121.5	130.5		126
								G	MeOH	122			122
									matrix A
									matrix B
								H	MeOH	127.7	130.5		129.1
									matrix A	129.7	132.5		131.1
									matrix B	128.5	131.5		130
								K	MeOH
									matrix A
									matrix B
